# Supplementary material for: Intrinsic Structural Disorder Confers Cellular Viability on Oncogenic Fusion Proteins
Source: PLoS Comput Biol. 2009 Oct 30;5(10):e1000552. doi: 10.1371/journal.pcbi.1000552 (PMC2768585; doi:10.1371/journal.pcbi.1000552)
Supplement: Table S1 — List of proteins observed in chromosomal translocations. 151 proteins without (Table S1A) and 255 proteins with (Table S1B) breakpoint (latter also indicated). The percentage disorder is also shown. (0.07 MB XLS) [file pcbi.1000552.s004.xls]

## Sheet: all151_No_Breakpoint
Table S1A
Protein/Transcript ID	%IU	Protein length	Gene name
3-DEXI-ENST00000331808	0	95	MYLE
CBPA6_HUMAN	0	437	CPA6
LHFP_HUMAN	0	200	LHFP
NP_002306	0	156	LMO1
NP_004613	0	228	TSN
NP_055732	0	438	NTNG1
DIRC2_HUMAN	0.41841	478	DIRC2
5-SLC45A3-ENST00000289710	0.904159	553	SLC45A3
5-TMPRSS2-ENST00000332149	1.01626	492	TMPRSS2
XRCC2_HUMAN	1.07143	280	XRCC2
LRC8A_HUMAN	1.11111	810	LRRC8A
NP_005565	1.26582	158	LMO2
CAA84538	1.57068	191	RHOH
TCL1A_HUMAN	1.75439	114	TCL1A
FBLN1_HUMAN	1.84922	703	FBLN1
MTCPB_HUMAN	1.86916	107	MTCP1
CHSTB_HUMAN	2.27273	352	CHST11
5-HAS2-ENST00000303924	2.35507	552	HAS2
5-LCP1-ENST00000378824	2.39234	627	LCP1
EFG1_HUMAN	2.3968	751	GFM1
AAK08064	3.26797	1224	BRWD2
CAD97777	3.3275	1142	ZMYM1
NP_005229	4.7619	441	ETS1
NP_055100	4.77816	293	EXOSC2
LCK_HUMAN	4.91159	509	LCK
FCRL5_HUMAN	4.913	977	FCRL5
XRCC3_HUMAN	4.91329	346	XRCC3
AAB29005	5.29595	321	BRCC3
P61812	5.31401	414	TGFB2
3-TBXAS1-ENST00000336425	5.61798	534	TBXAS1
BTG1_HUMAN	5.84795	171	BTG1
5-TFRC-ENST00000360110	5.92105	760	TFRC
KU86_HUMAN	6.96721	732	XRCC5
CAA45197	7.22892	332	FVT1
PTHB1_HUMAN	7.44081	887	BBS9
AAH17804	7.79221	77	SS18L2
CAI12897	7.92453	1325	ZMYM6
FSTL3_HUMAN	8.36502	263	FSTL3
5-CCND1-ENST00000227507	8.81356	295	CCND1
O60493	9.25926	162	SNX3
Q8WU17	9.63855	664	RNF139
5-OMD-ENST00000375550	10.4513	421	OMD
AF1Q_HUMAN	11.1111	90	MLLT11
O43930	11.1913	277	PRKY
P51817	11.7318	358	PRKX
NP_997216	11.9843	509	ZNF320
ZNF81_HUMAN	12.5567	661	ZNF81
KU70_HUMAN	12.6437	609	XRCC6
FHIT_HUMAN	12.9252	147	FHIT
AAB37258	13.5255	451	IRF4
3-MUC1-ENST00000337604	13.5531	273	MUC1
AAL73230	13.5714	420	DYX1C1
CAI16178	13.5903	493	ZMYM5
5-CHCHD7-ENST00000303759	14.5455	110	CHCHD7
MK10_HUMAN	15.3017	464	MAPK10
AAK83468	16.3462	104	DIRC1
5-LIFR-ENST00000263409	17.2288	1097	LIFR
FCG2B_HUMAN	18.0645	310	FCGR2B
IGHG1_HUMAN	18.7879	330	IGHG1
Q8NHQ8	19.5704	419	RASSF8
AAC97420	19.7309	669	CLPTM1
DDX6_HUMAN	19.8758	483	DDX6
AAB03087	21.7834	785	PCSK7
HBAP1_HUMAN	21.9262	488	HSPBAP1
AAC50439	21.9377	1445	PTPRG
TNKS1_HUMAN	22.0799	1327	TNKS
Q9NVA2	22.3776	429	SEPT11
NP_006353	22.7787	619	NXF1
TCTA_HUMAN	23.301	103	TCTA
3-HOXA13-ENST00000222753	23.4536	388	HOXA13
BCL2_HUMAN	23.8494	239	BCL2
PC11Y_HUMAN	24.2537	1340	PCDH11Y
5-IL21R-ENST00000337929	24.3494	538	IL21R
ZNF41_HUMAN	24.4823	821	ZNF41
PLAG1_HUMAN	24.8	500	PLAG1
3-USP6-ENST00000304328	24.8222	1406	USP6
AAA52745.1-C-0	25.7143	70	IGHA1
AAG23727	25.8621	116	BPESC1
MDS1_HUMAN	26.0355	169	MDS1
3-CHEK2-ENST00000382580	26.2799	586	CHEK2
5-CDH11-ENST00000268603	27.3869	796	CDH11
DCX_HUMAN	28.3582	402	DCX
NP_003067	30.6796	515	SMARCD1
RGPD8_HUMAN	31.1258	755	RGPD8
NP_001035889	32.0879	1365	WHSC1
MIPO1_HUMAN	32.1267	442	MIPOL1
Q05066	32.3529	204	SRY
BAA20839	32.7536	1380	ZMYM3
CAH71313	33.0749	1548	ZMYM4
BCL6_HUMAN	34.9858	706	BCL6
Q9P2F6	36.44	1191	ARHGAP20
NP_001091896	37.0998	531	SMARCD2
DISC1_HUMAN	38.1733	854	DISC1
O43295	38.3985	1099	SRGAP3
MD13L_HUMAN	39.0045	2210	MED13L
AAL07260	40	390	LHX4
TAL2_HUMAN	40.7407	108	TAL2
BCL3_HUMAN	41.0314	446	BCL3
SATB2_HUMAN	42.1555	733	SATB2
Q15468	42.5796	1287	STIL
3-PHF1-ENST00000374516	42.6808	567	PHF1
NP_036214	43.4405	1151	ZFPM2
5-ZNFN1A1-ENST00000331340	45.4721	519	IKZF1
BCL10_HUMAN	45.9227	233	BCL10
CLIP2_HUMAN	46.3671	1046	CLIP2
FNBP1_HUMAN	47.3258	617	FNBP1
Q9HCK4	47.4601	1378	ROBO2
CAA25015	47.836	439	MYC
NPAS3_HUMAN	47.91	933	NPAS3
NP_005512	49.697	330	TLX1
3-TRPS1-ENST00000220888	50.4294	1281	TRPS1
PAX7_HUMAN	50.9615	520	PAX7
HDAC9_HUMAN	51.3353	1011	HDAC9
3-FOXP1-ENST00000318789	51.8464	677	FOXP1
NP_060250	51.8852	2997	CHD7
FOXP2_HUMAN	52.028	715	FOXP2
Q9UHD8	52.5597	586	SEP9
3-ZNF687-ENST00000360939	52.7082	1237	ZNF687
NP_066295	52.8384	229	SSX5
MAF_HUMAN	52.8536	403	MAF
ZFHX4_HUMAN	53.5184	3567	ZFHX4
MTG8R_HUMAN	54.3046	604	CBFA2T2
5-SFRS3-ENST00000373715	56.0976	164	SFRS3
NP_001035090	57.6881	1834	MLLT4
3-ZNF384-ENST00000355772	58.5683	461	ZNF384
3-SH3D19-ENST00000304527	59.3393	787	SH3D19
AAF61215	61.6246	357	OLIG2
Q9ULL8	61.749	1498	SHROOM4
CDKL5_HUMAN	63.2039	1030	CDKL5
NP_066294	63.8298	188	SSX3
BC11A_HUMAN	65.6287	835	BCL11A
Q9BYB0	65.8817	1741	SHANK3
NP_777622	66.4894	188	SSX9
NP_775494	69.6809	188	SSX7
NP_002471	70.0971	1030	PPP1R12A
NP_775493	73.4043	188	SSX6
MLL2_HUMAN	73.4322	5262	WBP7
Q8NFD5	76.3864	2236	ARID1B
O14497	77.6368	2285	ARID1A
Q9P2R6	77.6501	1566	RERE
NP_009093	78.7815	476	TFEB
NP_005574	80.3571	280	LYL1
ENSP00000347847-C-0	80.4511	931	MKL1
CAA62012	81.6832	202	BCL7B
P17542	82.7795	331	TAL1
NP_005964	87.3727	491	PRCC
DDIT3_HUMAN-C-0	88.7574	169	DDIT3
NP_004756	89.8618	217	BCL7C
AUTS2_HUMAN	91.7395	1259	AUTS2
5-THRAP3-ENST00000354618	96.6492	955	THRAP3
BCL9_HUMAN	99.9299	1426	BCL9

## Sheet: all255_with_Breakpoint
Protein/Transcript ID	%IU	Segment Retained	Breakpoint	Protein Length	Gene Name
3-COX6C-ENST00000297564	0	C	38	75	COX6C
AF133334-C-1	0	C	1	607	RAP1GDS1
CHIC2_HUMAN	0	N	111	165	CHIC2
NP_000577.2-N-117	0	N	117	153	IL2
Q02223	0	C	3	184	TNFRSF17
3-RAD51L1-ENST00000344360	0.260417	C	252	384	RAD51L1
5-RANBP17-ENST00000377354	0.548446	N	931	1094	RANBP17
5-CLTC-ENST00000269122	1.07463	N	932	1675	CLTC
5-CNBP-ENST00000307433	1.07463	N	14	1675	CNBP
3-ACSL6-ENST00000379249	1.10803	C	17	722	ACSL6
5-GAPDH-ENST00000229239	1.19403	N	9	335	GAPDH
5-ATIC-ENST00000236959	1.52027	N	229	592	ATIC
3-JAK2-ENST00000381652	1.59011	C	312	1132	JAK2
3-NTRK3-ENST00000360948	1.90703	C	529	839	NTRK3
3-FLT3-ENST00000380987	1.90763	C	568	996	FLT3
3-GOT1-ENST00000370508	2.17918	C	40	413	GOT1
3-ACACA-ENST00000361253	2.25916	C	336	2346	ACACA
5-EML1-ENST00000327921	2.52101	N	535	714	EML1
3-ANKRD28-ENST00000383777	2.94659	C	687	1086	ANKRD28
NTRK1_HUMAN	3.01508	N	398	796	NTRK1
P08922	3.40861	C	1880	2347	ROS1
5-PIM1-ENST00000373509	3.51438	N	39	313	PIM1
5-HP-ENST00000355906	3.7037	N	146	405	HP
P07949	3.85996	C	712	1114	RET
5-ITK-ENST00000231189	4.03226	N	165	620	ITK
Table S1B
Protein/Transcript ID	%IU	Half retained	Breakpoint	Protein length	Gene name
GUAA_HUMAN-C-8	4.329	C	8	693	GMPS
3-ELN-ENST00000358929	5.05051	C	28	792	ELN
CAG33023.1-N-87	5.10708	N	87	607	RPN1
5-CDK6-ENST00000265734	5.21472	N	123	326	CDK6
3-MACROD1-ENST00000255681	5.84615	C	100	325	MACROD1
3-PPARG-ENST00000287820	6.13861	C	28	505	PPARG
5-PPP2R2A-ENST00000315985	6.26398	N	27	447	PPP2R2A
BIRC3_HUMAN	7.11921	N	442	604	BIRC3
3-MDS2-ENST00000374555	7.14286	C	49	140	MDS2
3-MALT1-ENST00000348428	7.52427	C	126	824	MALT1
P14373	8.18713	N	315	513	TRIM27
5-STAT5B-ENST00000293328	8.51334	N	635	787	STAT5B
3-FEV-ENST00000295727	9.2437	C	18	238	FEV
3-CCNB1IP1-ENST00000358932	9.38628	C	99	277	CCNB1IP1
3-PDGFRA-ENST00000381354	9.55005	C	551	1089	PDGFRA
3-SYK-ENST00000375754	11.3386	C	266	635	SYK
EAW52882.1-N-17	11.5234	N	17	512	FCRL4
NP_997636-N-236	12.0735	N	236	381	PRKAR1A
5-CARS-ENST00000278224	13.1016	N	606	748	CARS
3-EEFSEC-ENST00000254730	13.4228	C	106	596	EEFSEC
3-LAMA4-ENST00000230538	13.7137	C	65	1823	LAMA4
3-PDGFRB-ENST00000261799	13.8989	C	456	1108	PDGFRB
A40131-C-140	13.9932	C	140	293	TRD@
EAX03029.1-C-27	14.0212	C	27	378	SEPT5
CENPK_HUMAN	14.4981	C	96	269	CENPK
3-MYO1F-ENST00000309297	14.6364	C	1	1100	MYO1F
FRYL_HUMAN	15.1344	C	2302	3013	FRYL
BCAS4_HUMAN	16.1137	N	60	211	BCAS4
3-JARID1A-ENST00000261253	16.3763	C	1491	1722	JARID1A
3-SEPT2-ENST00000360051	16.6205	C	3	361	SEPT2
3-FGFR1-ENST00000310729	17.0316	C	426	822	FGFR1
3-FGFR3-ENST00000260795	17.2457	C	410	806	FGFR3
5-COL6A3-ENST00000295550	17.4378	N	1738	3177	COL6A3
5-KIAA1618-ENST00000319902	17.6678	N	1037	1415	KIAA1618
HXD13_HUMAN-C-252	18.209	C	252	335	HOXD13
3-ARHGAP26-ENST00000378013	18.3047	C	566	814	ARHGAP26
5-PRKG2-ENST00000264399	18.3727	N	304	762	PRKG2
5-SPTBN1-ENST00000356805	18.47	N	158	2366	SPTBN1
ZN521_HUMAN	19.1457	C	72	1311	ZNF521
5-HIST1H4I-ENST00000377467	19.4175	N	40	103	HIST1H4I
3-ALK-ENST00000306036	20.6173	C	1057	1620	ALK
5-HIP1-ENST00000336926	21.2705	N	1022	1039	HIP1
5-NCOA4-ENST00000344348	21.3355	N	238	614	NCOA4
5-NOTCH1-ENST00000277541	21.4481	N	1338	2555	NOTCH1
5-HSP90AB1-ENST00000353801	21.8232	N	49	724	HSP90AB1
AAG09033-C-253	23.0912	C	253	537	PATZ1
MSI2H_HUMAN	23.4756	N	217	328	MSI2
SEPT6_HUMAN-C-10	23.7327	C	10	434	SEPT6
3-CCND3-ENST00000372988	23.9583	C	62	288	CCND3
5-HSP90AA1-ENST00000334701	24.7073	N	122	854	HSP90AA1
3-GPHN-ENST00000315266	24.7283	C	243	736	GPHN
3-MAPRE1-ENST00000375571	25.3731	C	199	268	MAPRE1
NP_002599.1-C-22	26.971	C	22	241	PDGFB
5-AKAP9-ENST00000359028	27.0791	N	1103	3896	AKAP9
5-RANBP2-ENST00000283195	27.7916	N	867	3224	RANBP2
3-IQCG-ENST00000265239	27.991	C	321	443	IQCG
3-PICALM-ENST00000341783	28.2209	C	255	652	PICALM
NP_150241.2-N-552	28.2313	N	552	882	PML
5-STRN-ENST00000263918	28.5897	N	265	780	STRN
5-RABEP1-ENST00000262477	28.6543	N	738	862	RABEP1
3-BRAF-ENST00000288602	28.7206	C	393	766	BRAF
ZBT16_HUMAN	30.1634	N	394	673	ZBTB16
CASC5_HUMAN	30.316	C	1818	2342	CASC5
5-EML4-ENST00000318522	30.4791	N	496	981	EML4
GOPC_HUMAN	30.5195	N	419	462	GOPC
BCAS3_HUMAN	30.819	C	824	928	BCAS3
Q9NZQ3	30.8864	C	57	722	NCKIPSD
3-TOP1-ENST00000373305	31.634	C	205	765	TOP1
NP_775292-C-10	31.7111	C	10	637	NR4A3
EVI5_HUMAN	32.0988	C	594	810	EVI5
AAB29813.1-C-455	32.2844	C	455	858	RARA
5-SEC31A-ENST00000355196	33.6066	N	989	1220	SEC31A
FGOP2_HUMAN	33.9921	N	132	253	FGFR1OP2
Q9UBW7	34.5679	N	913	1377	ZMYM2
5-CEP110-ENST00000373855	34.6237	N	2139	2325	CEP110
3-HOXC11-ENST00000243082	34.8684	C	228	304	HOXC11
5-TPM3-ENST00000330188	35	N	221	240	TPM3
SH3G1_HUMAN	35.5978	C	15	368	SH3GL1
AAL56659.1-N-514	35.8889	N	514	1800	NUP98
3-HOXC13-ENST00000243056	36.3636	C	246	330	HOXC13
NP_074036.1-N-165	36.3636	N	165	187	CBFB
Q15643	36.5336	N	1754	1979	TRIP11
3-GAS7-ENST00000323816	36.7647	C	61	476	GAS7
5-PVRL2-ENST00000252483	36.803	N	29	538	PVRL2
3-ABL2-ENST00000344730	38.2519	C	38	1064	ABL2
5-BCR-ENST00000305877	38.9457	N	426	1271	BCR
5-EPC1-ENST00000375090	38.9952	N	581	836	EPC1
5-BRWD3-ENST00000373275	39.0122	N	850	1802	BRWD3
5-KIF5B-ENST00000375174	39.0447	N	848	963	KIF5B
5-CDK5RAP2-ENST00000373937	39.3027	N	494	1893	CDK5RAP2
NP_065972-N-2064	39.428	N	2064	2133	NIN
5-FCHSD1-ENST00000354789	39.4509	N	439	692	FCHSD1
3-WHSC1L1-ENST00000317025	39.5833	C	304	1440	WHSC1L1
DDX10_HUMAN-N-219	39.6571	N	219	875	DDX10
3-HOXA11-ENST00000006015	39.9361	C	237	313	HOXA11
3-ETV1-ENST00000242066	40.3766	C	315	478	ETV1
NFKB2_HUMAN	40.4444	N	491	900	NFKB2
3-ETV6-ENST00000266427	40.4867	C	11	452	ETV6
5-SENP6-ENST00000370010	41.1021	N	183	1107	SENP6
5-MYO18A-ENST00000354329	41.3709	N	1694	2057	MYO18A
5-PDE4DIP-ENST00000369356	41.5326	N	742	2362	PDE4DIP
5-POU2AF1-ENST00000228217	41.7969	N	5	256	POU2AF1
5-MYH9-ENST00000216181	42.2449	N	1644	1960	MYH9
5-KTN1-ENST00000356229	42.4466	N	964	1357	KTN1
Q15022	42.4899	C	93	739	SUZ12
5-TCEA1-ENST00000314297	42.9577	N	15	284	TCEA1
3-MYH11-ENST00000300036	43.1034	C	1217	1972	MYH11
3-ADD3-ENST00000277900	43.3234	C	578	674	ADD3
O15164	43.7143	N	476	1050	TRIM24
NP_002008.2-C-261	44.2478	C	261	452	FLI1
5-PAX8-ENST00000263334	45.0111	N	259	451	PAX8
3-WWOX-ENST00000335140	45.0704	C	162	213	WWOX
DAB2P_HUMAN	46.1733	C	172	1189	DAB2IP
Q9UPN9	47.1162	N	964	1127	TRIM33
HXA9_HUMAN	47.4265	C	163	272	HOXA9
JAZF1_HUMAN	47.7366	N	129	243	JAZF1
CCDC6_HUMAN	47.8632	C	101	585	CCDC6
EAX04279.1-N-334	48.0634	N	334	568	RUNX2
ELL_HUMAN	48.4702	C	44	621	ELL
3-ABL1-ENST00000266100	48.651	C	46	1149	ABL1
5-ASPSCR1-ENST00000306729	48.9954	N	311	647	ASPSCR1
3-EPS15-ENST00000371733	48.9955	C	11	896	EPS15
5-MSN-ENST00000275995	49.0468	N	448	577	MSN
AAH02827-N-221	49.1935	N	221	248	TPM4
3-CCDC28A-ENST00000356569	49.635	C	76	274	CCDC28A
5-GIT2-ENST00000360185	49.9295	N	332	709	GIT2
3-ETV4-ENST00000319349	50	C	271	480	ETV4
3-SEPT9-ENST00000329047	50	C	1	562	SEPT9
3-PRRX1-ENST00000234744	50.2041	C	81	245	PRRX1
3-YTHDF2-ENST00000373812	50.2591	C	572	579	YTHDF2
3-CDKN2A-ENST00000361279	50.289	C	106	173	CDKN2A
CXXC6_HUMAN	50.3277	C	1608	2136	CXXC6
PBX1_HUMAN	50.9302	C	88	430	PBX1
3-CBL-ENST00000264033	51.1038	C	477	906	CBL
ARHGC_HUMAN	51.2953	C	308	1544	ARHGEF12
NU214_HUMAN	51.7703	C	812	2090	NUP214
3-HOXD11-ENST00000249504	51.7751	C	261	338	HOXD11
3-CREB3L1-ENST00000288400	52.7831	C	222	521	CREB3L1
FR1OP_HUMAN	52.8822	N	173	399	FGFR1OP
CR3L2_HUMAN	53.2692	C	222	520	CREB3L2
3-RUNX1-ENST00000300305	54.375	C	20	480	RUNX1
5-MNX1-ENST00000252971	55.611	N	230	401	MNX1
ENSP00000358799-N-955	55.783	N	955	977	RBM15
NP_077744.3-C-417	56.6731	C	417	517	WT1
3-PAX5-ENST00000377859	56.7775	C	16	391	PAX5
3-NSD1-ENST00000355783	57.5668	C	1266	2696	NSD1
3-CSF1-ENST00000329608	58.6643	C	132	554	CSF1
MYST4_HUMAN	60.685	N	1222	2073	MYST4
ENSP00000296930-C-117	60.8844	C	117	294	NPM1
3-RUNX1T1-ENST00000265814	61.4238	C	30	604	RUNX1T1
PRRX2_HUMAN-C-86	61.6601	C	86	253	PRRX2
BC11B_HUMAN-N-143	61.9687	N	143	894	BCL11B
ABI1_HUMAN	62.0079	C	95	508	ABI1
P23760	62.4217	N	319	479	PAX3
GOGA5_HUMAN	62.6539	C	497	731	GOLGA5
LPP_HUMAN	62.9085	N	371	612	LPP
AF17_HUMAN	63.495	C	551	1093	MLLT6
TPR_HUMAN	63.6867	N	191	2349	TPR
MYST3_HUMAN	63.7725	N	813	2004	MYST3
3-MLLT1-ENST00000252674	64.2218	C	4	559	MLLT1
3-DEK-ENST00000244776	64.2667	C	349	375	DEK
3-CREB1-ENST00000236996	64.5161	C	183	341	CREB1
3-MLLT3-ENST00000380338	65.1408	C	140	568	MLLT3
5-SPECC1-ENST00000261503	65.1685	N	690	1068	SPECC1
Q8IUD2	65.233	N	719	1116	ERC1
3-PER1-ENST00000317276	65.5039	C	1200	1290	PER1
5-ZMIZ1-ENST00000334512	65.5075	N	705	1064	ZMIZ1
3-CBFA2T3-ENST00000268679	65.5436	C	51	653	CBFA2T3
CAD90570.1-C-110	65.9574	C	110	188	SSX4B
NONO_HUMAN	66.242	N	377	471	NONO
3-CDX2-ENST00000381020	66.4537	C	181	313	CDX2
Q96K21	66.879	C	145	471	ZFYVE19
SET_HUMAN	66.8966	N	283	290	SET
3-LASP1-ENST00000318008	67.0498	C	204	261	LASP1
EP300_HUMAN	67.6471	N	31	2414	EP300
5-FOXO4-ENST00000374259	67.9208	N	151	505	FOXO4
CBP_HUMAN	68.018	C	29	2442	CREBBP
5-CAPRIN1-ENST00000257845	68.5185	N	269	648	CAPRIN1
AAT47519-C-80	68.5393	C	80	1068	MLLT10
NP_783629-C-110	68.617	C	110	188	SSX2B
3-USP42-ENST00000306177	68.8973	C	81	1315	USP42
NP_002117-C-224	69.1525	C	224	295	HLF
P19532-C-295	69.7174	C	295	743	TFE3
NRG1_HUMAN	69.8438	C	34	640	NRG1
NP_005626.1-C-110	70.2128	C	110	188	SSX1
NP_006188.3-N-1470	70.4545	N	1470	2024	PCM1
3-TFPT-ENST00000339150	70.751	C	214	253	TFPT
NP_006061-N-240	71	N	240	400	TFG
3-MLL-ENST00000359313	71.7561	C	1493	3969	MLL
DAZP1_HUMAN-C-154	71.9902	C	154	407	DAZAP1
NCOA1_HUMAN	72.1027	C	867	1441	NCOA1
5-c15orf55-ENST00000333756	72.9682	N	5	1132	NUT
NP_005162.1-C-109	74.9077	C	109	271	ATF1
3-AFF3-ENST00000356421	75.1399	C	332	1251	AFF3
Q12778	75.2672	C	210	655	FOXO1
MLF1_HUMAN	76.1194	C	16	268	MLF1
NP_002276-C-308	76.5905	C	308	1226	AFF1
BAD92078.1-N-1367	77.0978	N	1367	1585	NUMA1
ASXL2_HUMAN-C-20	77.2822	C	20	1435	ASXL2
P23246	77.5106	N	662	707	SFPQ
3-FOXO3-ENST00000343882	78.0089	C	207	673	FOXO3
MEF2D_HUMAN-C-285	78.8868	C	285	521	MEF2D
PHF23_HUMAN-C-120	79.6526	C	120	403	PHF23
3-PSIP1-ENST00000380738	79.8113	C	96	530	PSIP1
3-SETBP1-ENST00000282030	81.0636	C	1337	1542	SETBP1
5-CRTC1-ENST00000321949	81.7323	N	42	635	CRTC1
AFF4_HUMAN	82.0292	C	350	1163	AFF4
NCOA2_HUMAN	82.3087	C	869	1464	NCOA2
5-COL1A2-ENST00000297268	83.8214	N	23	1366	COL1A2
5-CRTC3-ENST00000268184	83.9744	N	44	624	CRTC3
NP_149418.2-C-325	84.434	C	325	424	DUX4
3-BRD4-ENST00000263377	84.7283	C	861	1362	BRD4
AAK73515.1-N-1567	87.0647	N	1567	1608	CIC
5-SS18L1-ENST00000216863	87.3737	N	388	396	SS18L1
AAB59373-N-269	87.4363	N	269	589	COL1A1
FIP1_HUMAN-N-339	88.8889	N	339	594	FIP1L1
3-TCF3-ENST00000262965	88.9908	C	319	654	TCF7L1
P15923	88.9908	N	483	654	TCF3
5-MN1-ENST00000302326	90.4255	N	1256	1316	MN1
3-BCL7A-ENST00000261822	90.4762	C	31	231	BCL7A
5-EWSR1-ENST00000331029	90.5488	N	324	656	EWSR1
NP_996919-N-108	93.3428	N	108	706	TCF12
FUS_HUMAN	93.9163	N	266	526	FUS
NP_631961.1-N-162	94.4257	N	162	592	TAF15
3-MAP4-ENST00000264724	95.6032	C	402	887	MAP4
AAU43853.1-N-83	96.7391	N	83	92	HMGA2
5-SS18-ENST00000269138	97.8469	N	410	418	SS18
NP_001007560-N-410	97.8469	N	410	418	SYT1
MAML2_HUMAN-C-173	98.0052	C	173	1153	MAML2
5-HMGA1-ENST00000357318	100	N	90	107	HMGA1
